# Supplementary material for: Electron-rich Pt anchored on covalent triazine frameworks for the selective hydrogenation of halogenated nitrobenzenes
Source: Royal Society of Chemistry journal article supplement (doi:10.1039/d3gc04671k), 2024-01-01
Supplement: d3gc04671k1.pdf [file d3gc04671k1.pdf]

**Electron-rich Pt anchored on covalent triazine frameworks for the selective  
hydrogenation of halogenated nitrobenzenes**

Mengmeng Gao,<sup>a,#</sup> Jinfang Kou,<sup>a,#</sup> Manhua Xu,<sup>a,#</sup> Kun Yuan,<sup>b,\*</sup> Mengyang Li,<sup>c,\*</sup>  
Zhengping Dong<sup>a,\*</sup>

<sup>a</sup> State Key Laboratory of Applied Organic Chemistry, Laboratory of Special Function Materials and Structure Design of the Ministry of Education, College of Chemistry and Chemical Engineering, Lanzhou University, Lanzhou 730000, PR China.

<sup>b</sup> Key Laboratory for New Molecule Materials Design and Function of Gansu Universities, College of Chemical Engineering and Technology, Tianshui Normal University, Tianshui 741001, PR China.

<sup>c</sup> School of Physics, Xidian University, Xi'an 710071, PR China.

<sup>#</sup> These authors contributed equally to this work.

\* **Corresponding authors,** Email: [yuankun@tsnu.edu.cn](mailto:yuankun@tsnu.edu.cn) (Kun Yuan), [limengyang@xidian.edu.cn](mailto:limengyang@xidian.edu.cn) (Mengyang Li), [dongzhp@lzu.edu.cn](mailto:dongzhp@lzu.edu.cn) (Zhengping Dong).

Tel.: 86-931-8912577.

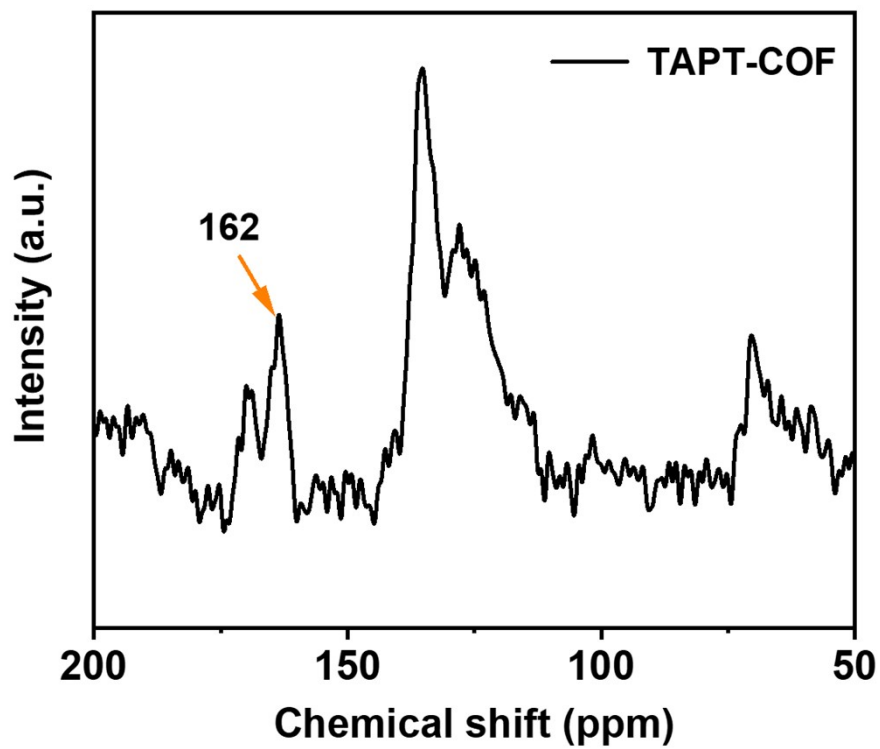

Figure S1. The  $^{13}\text{C}$  NMR of TAPT-COF.

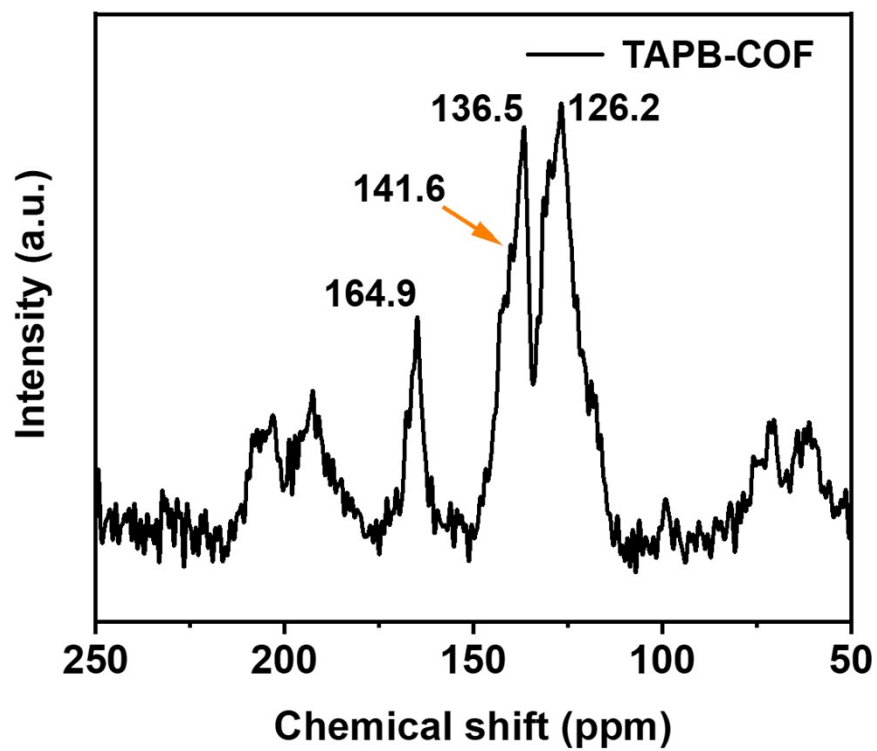

Figure S2. The  $^{13}\text{C}$  NMR of TAPB-COF.

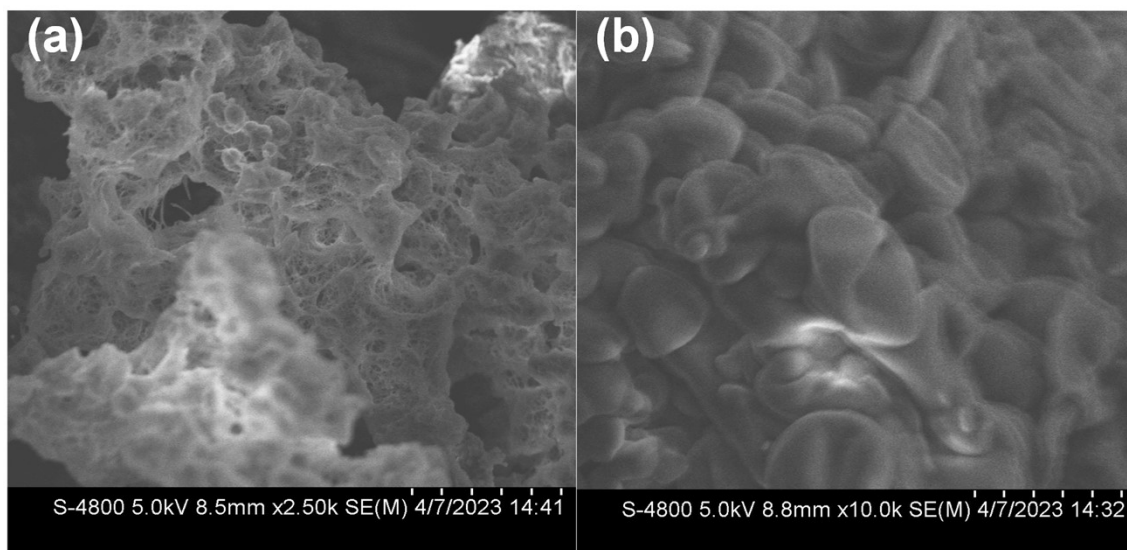

**Figure S3.** (a) SEM image of TAPT-COF. (b) SEM image of TAPB-COF.

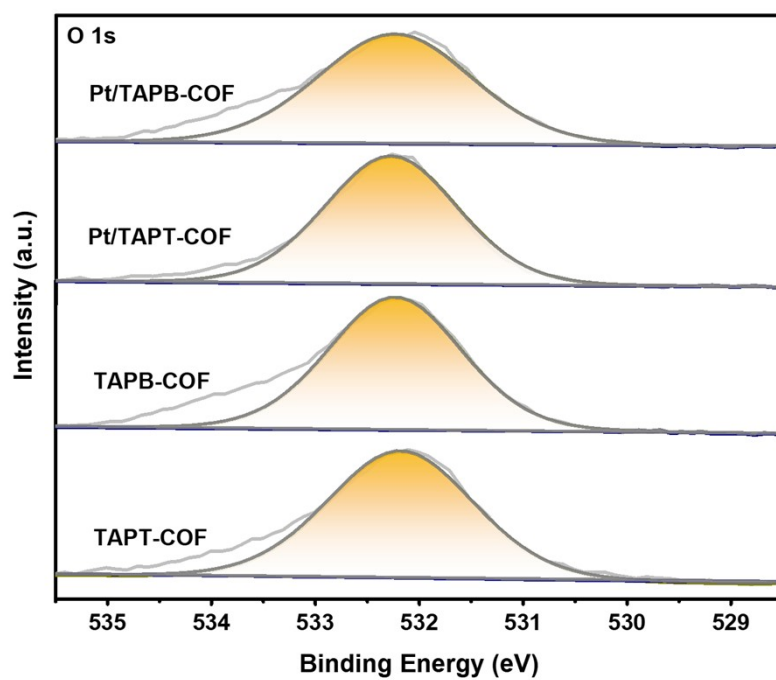

**Figure S4.** High-resolution O 1s XPS spectra of TAPT-COF, Pt/TAPT-COF, TAPB-COF and Pt/TAPB-COF.

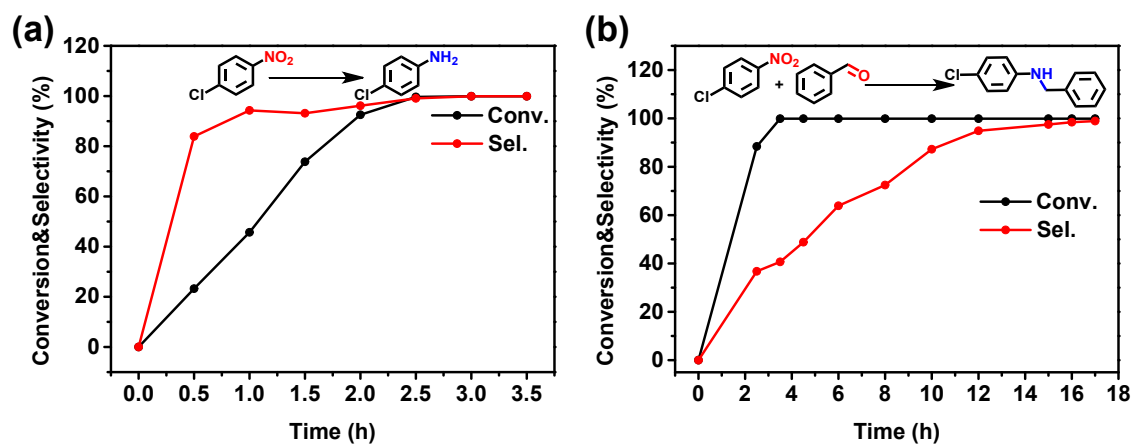

**Figure S5.** (a) Evolution curves of conversion and selectivity over time for hydrogenation of *p*-chloronitrobenzene (*p*-CNB). (b) Evolution curves of conversion and selectivity over time for tandem reaction of *p*-CNB and benzaldehyde.

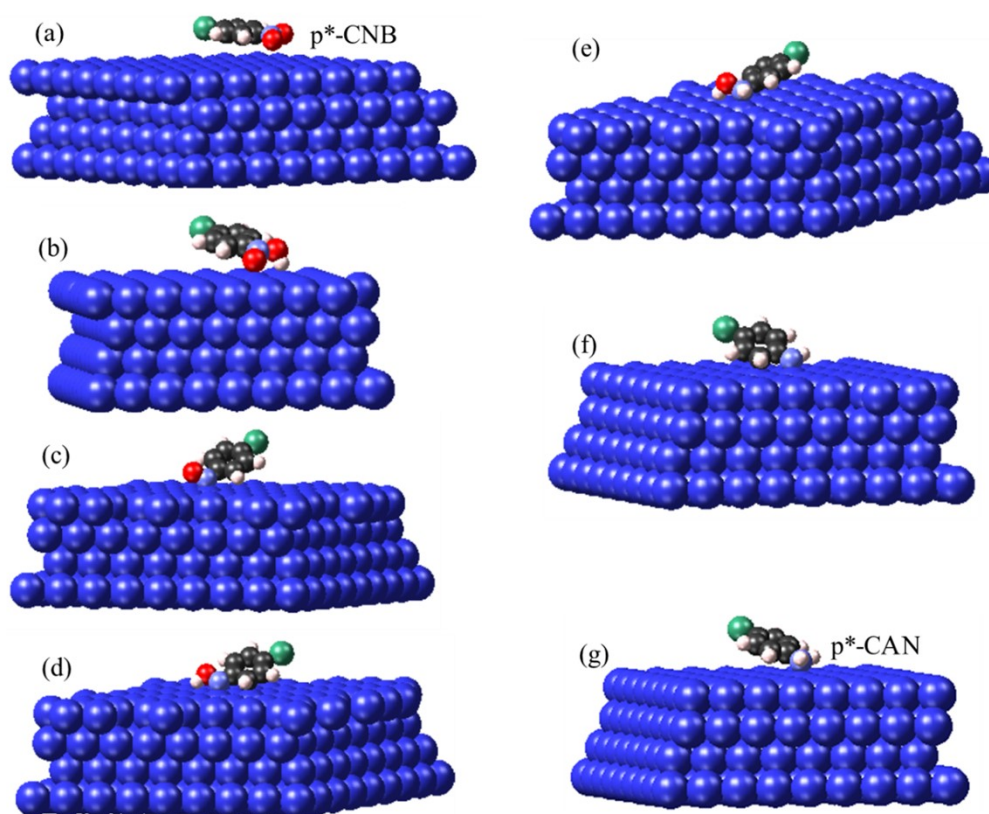

**Figure S6.** Structures in the stage of hydrogenation reduction of *p*-CNB to form *p*-CAN on surface of Pt (111).

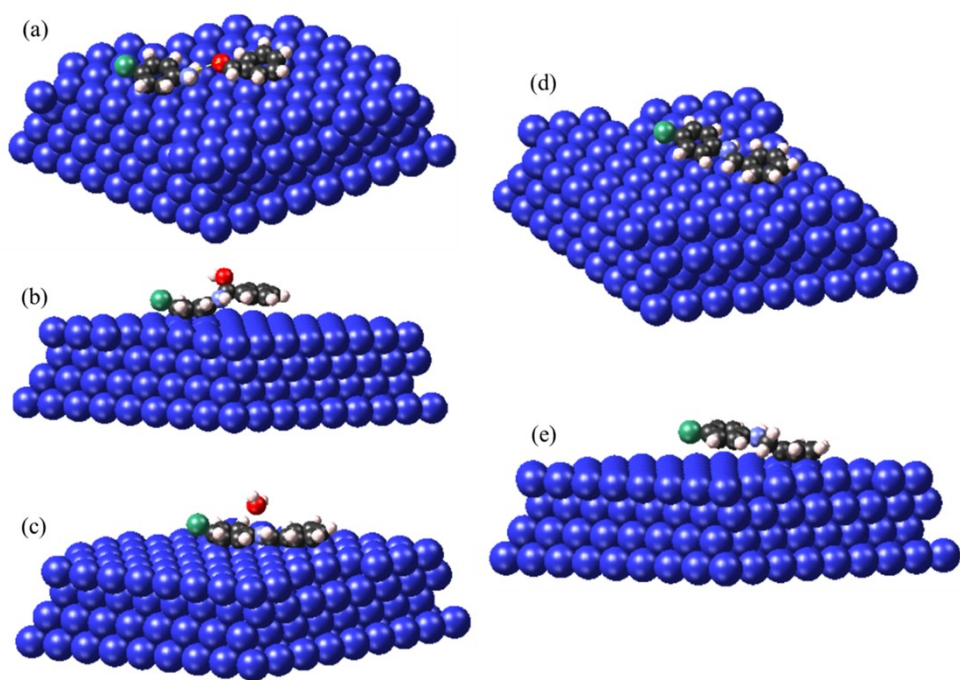

**Figure S7.** Structures in the stages of coupling elimination and imine hydrogenation on of Pt (111) surface.

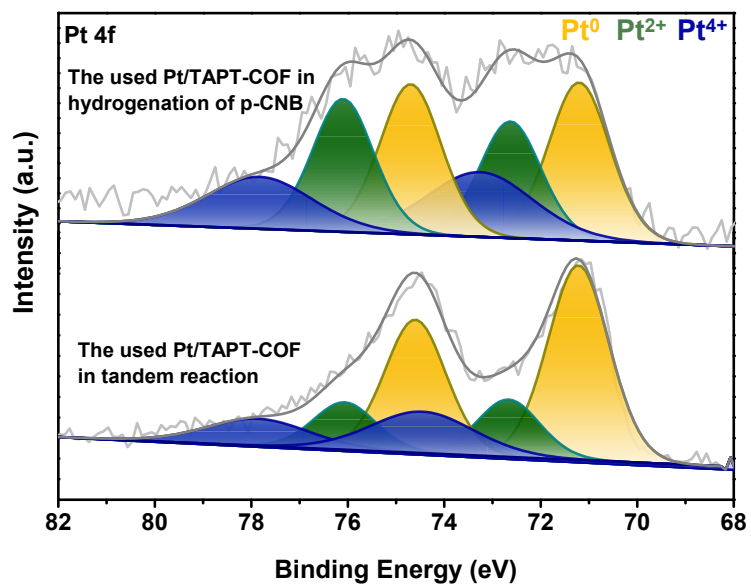

**Figure S8.** High-resolution Pt 4f XPS spectrum of the used Pt/TAPT-COF in hydrogenation of *p*-CNB and the tandem reaction.

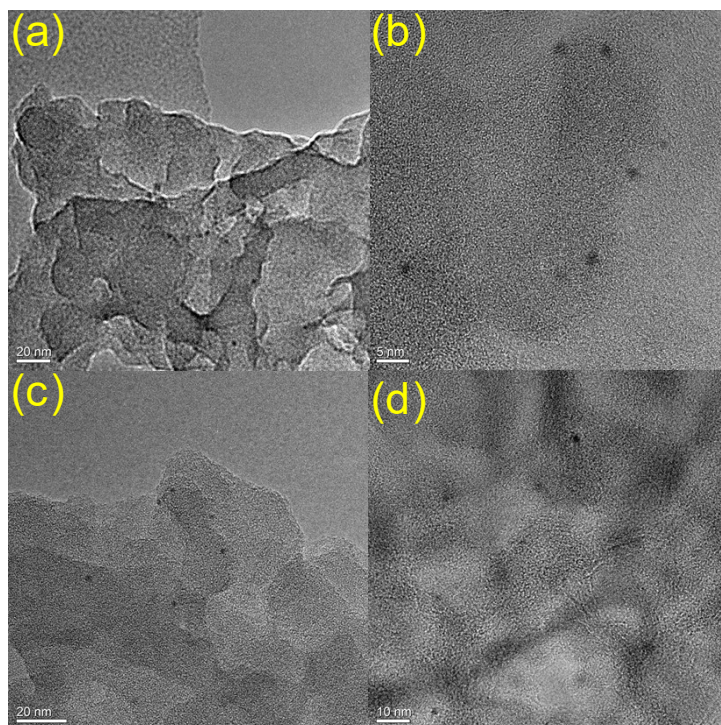

**Figure S9.** (a-b) TEM images of the used Pt/TAPT-COF in hydrogenation of *p*-CNB. (c-d) TEM images of the used Pt/TAPT-COF in the tandem reaction.

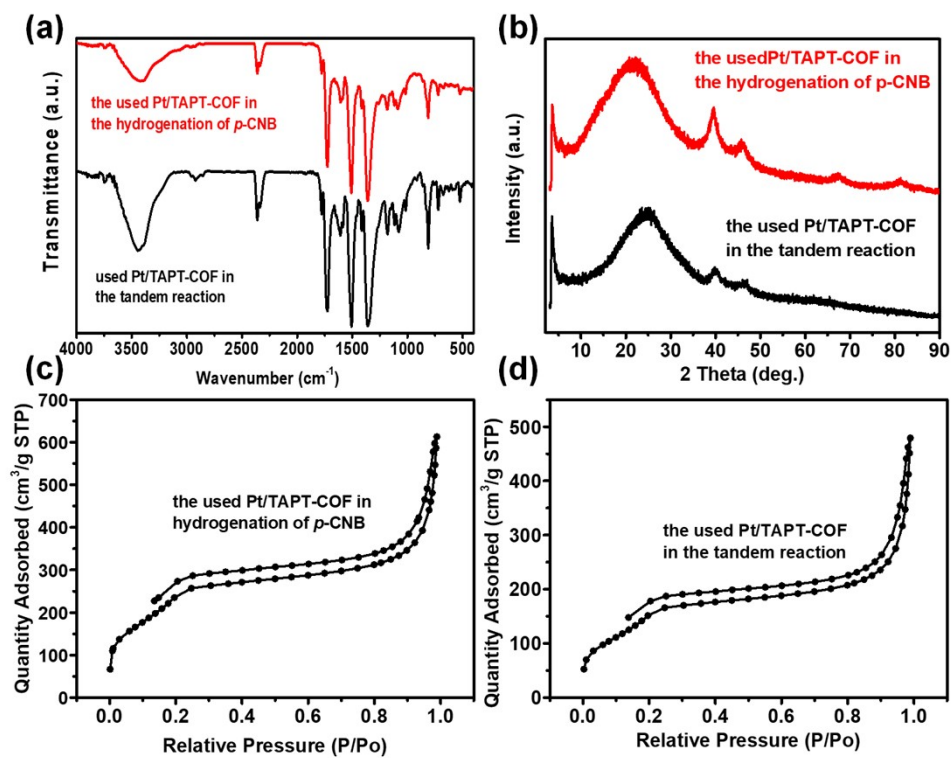

**Figure S10.** (a) FT-IR for the used Pt/TAPT-COF in the hydrogenation of *p*-CNB and the used Pt/TAPT-COF in the tandem reaction. (b) PXRD of the used Pt/TAPT-COF in the hydrogenation of *p*-CNB and the used Pt/TAPT-COF in the tandem reaction. (c) Nitrogen adsorption/desorption isotherms of the used Pt/TAPT-COF in hydrogenation of *p*-CNB. (d) Nitrogen adsorption/desorption isotherms of the used Pt/TAPT-COF in the tandem reaction.

**Table S1.** The Products distribution of cascade reaction catalyzed by Pt(5%)/C.<sup>a</sup>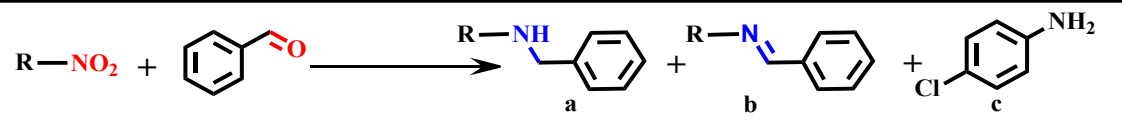

The reaction scheme shows the reduction of  $R-NO_2$  and benzaldehyde (c1ccc(cc1)C=O) to form three products: a secondary amine (**a**), an imine (**b**), and *p*-chloroaniline (**c**).

| Entry | Catalyst | Catalyst amount (mg) | Solvent (3 mL)   | T (°C) | Time (h) | Conv. (%) | a (%) | b (%) | c (%) |
|-------|----------|----------------------|------------------|--------|----------|-----------|-------|-------|-------|
| 1     | Pt(5%)/C | 15                   | THF              | 60     | 16       | 99.9      | 61.0  | 37.1  | 1.9   |
| 2     | Pt(5%)/C | 15                   | DMF              | 60     | 16       | 99.9      | 3.4   | 58.2  | 38.4  |
| 3     | Pt(5%)/C | 15                   | Ethanol          | 60     | 16       | 98.9      | 82.3  | 17.7  | -     |
| 4     | Pt(5%)/C | 15                   | H <sub>2</sub> O | 60     | 16       | 98.1      | 0.3   | 8.7   | 91.0  |

<sup>a</sup> **Reaction conditions:** *p*-chloronitrobenzene (*p*-CNB, 0.5 mmol), benzaldehyde (0.7 mmol), H<sub>2</sub> balloon and solvent (3 mL). All products were analyzed by GC-MS and GC.
